# Supplementary material for: Ice core chemistry database: an Antarctic compilation of sodium and sulphate records spanning the past 2000 years
Source: Copernicus journal article supplement (doi:10.5194/essd-2022-368), 2022-12-12
Supplement: Supplementary file [file essd-2022-368-AC1-supplement.pdf]

## Response to reviewer 1:

We thank the reviewer for their helpful comments and detailed suggestions. We are glad they have recognised the value and importance of this database. Below we respond to each point in turn.

General comment

**This paper represents the synthesis of a major community effort to create a useful and comprehensive dataset derived from hundreds of snowpits, and ice and firn cores retrieved over the past decades across Antarctica. Although some minor aspects listed below need to be clarified before publication, the article itself is adequate to support the publication of a dataset, and the overall structure of the article is well structured and clear to the reader. The annual resolution data are likely to be useful for future studies, thus I support their publication. I particularly appreciated the so-called "first-pass filtering" of the data provided, which makes it easier to identify the potential of a given ice core site for past environmental reconstructions and/or comparisons between data and models.**

Thank you for your comments. It was indeed our intention to apply a first-pass filter that would make it easier for the community to decide which records to use for future reconstructions.

**-Line 80: Please rephrase the sentence to avoid the repetition of the word "contain".**

Updated to "comprises".

**-Line 81: Specify which are the climate observation/variable used to filter the dataset.**

We have updated the sentence to specify which observations were used.

"An initial filter has been applied, based on evaluation against sea ice concentration, geopotential heights (500 hPa) and surface wind fields climate observations, to identify sites suitable for reconstructing past sea ice conditions, wind strength, or atmospheric circulation."

**-Line 96: Consider adding the words in capital for clarity:" value of large datasets in reconstructing climate and sea ice VARIABILITY over decadal to centennial TIME scales"**

Updated.

**-Line 100: Please fix the reference format for the "Wais divide project members".**

Updated.

**-Lines 105-106: Add additional Ref. to Minikin et al., 1994. A more recent study could be "Rhodes, R.H., Yang, X., Wolff, E.W., 2018. Sea ice versus storms: what controls sea salt in arctic ice cores? Geophys. Res. Lett. 45, 5572e5580."**

Included.

**-Line 114: In my opinion the annotation "xs" used to define the excess of [SO42-] is a bit confusing through the text. Please consider to change it with the annotation [SO42-]Exc according also to other ice-core based studies.**

We used the convention (xs) of Dixon et al., 2004 for consistency. This is the most comprehensive study of excess SO4 for our region of interest. We can change to excess throughout if preferred, however, we would rather stick with xs SO4.

**-Lines 132-134: The sentence "... 2) the data comprise two distinct chemical species which do not have a well-established relationship with climate (beyond the episodic sources of [SO42-] noted above)" is not clear, please rephrase it for clarity.**

The sentence has been expanded for clarity.

2) the data comprise two distinct chemical species which do not have a well-established relationship with climate. *This differs from previous compilations where the data can be either directly, or indirectly, compared with a modelled or observed climate parameter e.g. temperature (Stenni et al., 2017).*

**-Line 145: What do you mean for "... providing a threshold of half a year of data was achieved", please rephrase it for clarity.**

This sentence has been removed to avoid confusion. It only applies to the upper most (or lower most) years where the distance between the first age-marker and the surface (or bottom depth) is not a complete year.

**-Lines 156-158: Change "two" with "few" and "the third" with "another".**

Updated.

**-Lines 173-174. This statement is not entirely correct because is not enough to have an ICP-MS to see the total concentration. Once the sample is acidified, you can see part of the total, or the dissolved particles. In this regard, it is important to mention that there are different protocols for acidifying samples by making use of different acids (HCl, HNO<sub>3</sub>, HF, etc.) and different acidification times (days, weeks, months) based on which different absolute concentrations might be obtained as illustrated by Gaspari et al. (2006), Koffman et al. (2014), and Burgay et al. (2021).**

Thank you, this additional information is now included in this section.

"However, we note that there are different protocols for acidifying the samples prior to analysis which may result in different absolute concentrations, including the choice of acid, the acid concentration, and the acidification time.."

**-Lines 180-182: Insert Ref. to both sentences.**

Inserted Legrand and Mayewski, 1997 and Barnes et al., 2006.

**-Line 196: Insert the equation used to calculate flux from concentration with the units presented in the dataset (i.e. ppb kg m<sup>-2</sup>). It would also be appropriate to explain why these units were chosen instead of the more common (mg m<sup>-2</sup>) or (ug m<sup>-2</sup>). In this way, indeed, a user can easily infer the annual snow accumulation (in kg/m<sup>2</sup> or mm w.e.) simply by dividing the flux with the concentration.**

Equation added.

If required, most of the snow accumulation records are available in the PAGES 2k database. We would strongly recommend using this database to extract snow accumulation, to ensure the correct citations are included.

Thomas, E. "Antarctic regional snow accumulation composites over the past 1000 years" v2 (2017) Polar Data Centre, Natural Environment Research Council, UK. doi:10.5285/cc1d42de-dfe6-40aa-a1a6-d45cb2fc8293

**-Lines 210: Add a Ref. to the sentence “Other ratios may be more suitable for coastal sites (Ref.), ...”.**

Added Dixon et al., 2004.

**-Lines 241-244: This part is a bit misleading. You start the paragraph saying, “A total of 117 records were submitted, representing 105 individual ice core sites (Fig. 1)”, however, looking at Table 1, the Total records are only 105 and the Total ice core sites are 90 with 15 duplicates. Where are listed the remaining 12 records? Furthermore, please change “Table A1” with “Table S1” as indicated in Appendix A.**

We agree the table is a bit misleading and have updated it in the revised version.

There is a slight discrepancy in the definition of duplicates, which has now also been updated. There are 15 records which were submitted with the same location (same latitude and longitude). This includes 12 replicates, where the same ice core has been analysed using a different instrument, at a different resolution, at different laboratories or at a different time. However, at some sites (e.g., Vostok), there are multiple ice cores drilled at almost the exact same location (same coordinates) but are distinct and different ice cores. Hence why the total number of ice cores is 105.

We have separated out the different species in the new table, because not all the 117 records contained both Na and SO<sub>4</sub>. Some sites were submitted with just Na or just SO<sub>4</sub>, and not all replicates included both. We have also updated the table to clarify that a total of 94 ice core sites contain all three species (Na, SO<sub>4</sub> and XSSO<sub>4</sub>) is 94.

Table reference changed and the analytical replicates are now highlighted in table S1 using italics.

We have also added the following line to the data records section.

“This includes sites where analysis was undertaken at different laboratories, using different instrumentation (e.g., IC and ICP-MS) or different depth resolution. Some ice cores only provide data for a single species and not all records contain both flux and concentration. A total of 94 ice core sites are included in the database which provide [Na<sup>+</sup>], [SO<sub>4</sub><sup>2-</sup>] and xs [SO<sub>4</sub><sup>2-</sup>].”

**-Line 260 (Figure 1 / Panels A-B): Since all the records, except for one, are homogeneously distributed across all the continent it would be worth zooming in a little bit more and create a separate small box only for Bouvet Island.**

The figures have been updated to focus on the continent.

**(Figure 1 / Panels C-D): Because of the low resolution of the graphs, also after zooming in, it’s still very hard to distinguish each single record based on its duration (the file looks like formatted as a jpg or jpeg file). Besides that, the right part of the graphs (i.e., around Year CE 2000) appears oblique going from the top to the bottom of the graph. Is it due to some indistinguishable records present from 2000 CE to the end of the graph? Please submit a new version of Panels C-D increasing the resolution (i.e., uploading the original vector file) for clarity.**

Figures all updated to improve resolution and clarity.

**-Lines 334-335: In the sentence “Proportionally, more records are correlated with SIC when using flux THAT (than?) concentration (78 % compared to 72 %)” percentages are not corrected. Please adjust them according to the values listed in Table 3 (if I understand correctly, it should be 86% compared to 78%).**

Corrected.

**-Line 338: The additional records marked as uncertain in Table 3 are 3 and not 4 as stated in the sentence. Fix the table or the sentence with the correct value.**

Corrected.

**-Line 349 (Figure 3): Similarly to what was suggested for Figure 1, in my opinion the panels shown in Fig. 3 would also deserve a zoom to better visualize the individual ice core sites and their spatial distribution across Antarctica (with a separate small box for Bouvet Island). Also consider changing the color of both the fill and the edges of the diamonds representing sites with no correlation; gray might be difficult to distinguish from sites with uncertain and/or significant correlation.**

All figures updated to better visualise the individual ice core sites.

**-Lines 361-362: The records of SO<sub>4</sub> indicated in Table 3 are 40 and not 39 as stated in the sentence. Also, the percentage need to be fixed accordingly (they seem to be reversed in the sentence). Fix the table or the sentence with the correct value. Same in Line 369, "26 records (out of 59)" should be out of 61, as indicated in Table 3. Fix the table or the sentence with the correct value.**

Corrected.

**-Line 371: Flux should be concentration or, alternatively, the percentages must be inverted, and the sentence adjusted accordingly.**

Updated.

**-Lines 373-396 (Figure 4 and 5): Same comments as for Figure 3.**

Updated.

**-Line 407: For consistency, add the ionic form for [Na<sup>+</sup>] (also in lines 411,431, and 473).**

Updated.

**-Line 408: I would replace "thus" with "this suggest that".**

Updated.

**-Line 410: For an easier identification of the "most useful" sites for climatic studies, it would be nice if the full list of sites presented in Table S2 would be ordered from top to bottom according to the number of correlations with the others climate variables. In this way, sites with a larger number of correlations (i.e. "ITASE-02-6") would be listed in top rows of Table S2, while site with a lower number of correlations (i.e. WHG (ICPMS)) would fill the last rows.**

I agree that presenting the records in order of corelation makes a lot of sense, thank you. The table has been updated to list the sites with the most correlations first. An additional column is added to show the number of corelations for each site.

**-Lines 419-420: Replace "In East Antarctica" with "In contrast, in East Antarctica, "**

Updated .

**-Line 425: Replace "to covert to" with "needed to calculate the flux".**

Updated

**-Lines 431-432: Please rephrase this period for clarity. I suggest something like: “Overall, the records of [Na+] exhibit the highest number of correlations with the climatic variables considered (179 out of 264) , followed by xs [SO42-] (or [SO42-]Exc )(164 out of 243), and ([SO42-] (152 out of 252).”**

Updated.

**-Line 474: Rephrase the sentence about Na flux in a more conservative way, such as “The Na flux exhibits the greatest proportion of records that correlate with sea ice, atmospheric circulation, and winds. Therefore, among the ice-core chemical species considered in our analysis, we propose Na+ flux as the best candidate for reconstructing all three climatic components”.**

Updated.
